# Supplementary material
Source: publisher figshare collection journal article supplement (https://tandf.figshare.com/ndownloader/files/14681882)
Supplement: Supplementary file 1 [file 14681882]

## SUPPLEMENTARY MATERIAL

### Plasticizers and BPA in spices and aromatic herbs of Mediterranean areas

Vincenzo Lo Turco<sup>a</sup>, Angela Giorgia Potortì<sup>\*a</sup>, Hedi Ben Mansour<sup>b</sup>, Giacomo Dugo<sup>a</sup>,  
Giuseppa Di Bella<sup>a</sup>

<sup>a</sup> Dipartimento di Scienze Biomediche, Odontoiatriche e delle Immagini Morfologiche e Funzionali of  
the University of Messina, Italy; <sup>b</sup> Research Unit of Analysis and Process Applied to Environmental –  
APAE UR17ES32, Higher Institute of Applied Sciences and Technology Mahdia, University of  
Monastir, Tunisia

Vincenzo Lo Turco, vloturco@unime.it

Angela Giorgia Potortì, agpotorti@unime.it

Hedi Ben Mansour, hdbenmansour@gmail.com

Giacomo Dugo, dugog@unime.it

Giuseppa Di Bella, gdibella@unime.it

**\*Corresponding author:** Angela Giorgia Potortì, BioMorf Department, University of Messina,  
V.le Annunziata 98168, Messina, Italy. Phone: +39 090 6766993; e-mail address:  
agpotorti@unime.it

## **Abstract**

This research is carried out in order to characterize the actual contamination by two ubiquitous environmental pollutants, plasticizers and Bisphenol A, in spices (black pepper, caraway and coriander) and aromatic herbs (fennel, laurel, mint, oregano, rosemary, thyme and verbena) from Algeria (n=26), Tunisia (n=65) and Italy (n=53). Algerian samples seem to contain fewer residues than Italian and Tunisian samples. Among the Italian samples, only aromatic herbs, precisely mint, oregano, and laurel, were contaminated. In general, all Tunisian samples showed five plasticizers residues: the caraway, among the spices, and the rosemary, among the aromatic herbs, are found to contain more residues. Also, dietary intake of these contaminants by spices and aromatic herbs under analysis seems not to constitute a ~~dangerous~~ risk to the consumers.

**Keywords:** Plasticizers; Bisphenol A; spices and aromatic herbs; GC/MS; EDI

## EXPERIMENTAL

### *Chemicals*

All analytical standards, with certified purity > 99%, of Di-methyladipate (DMA), di-ethyladipate (DEA), di-methylphthalate (DMP), di-ethylphthalate (DEP), di-(2-methylpropyl)adipate (DiBA), di-n-butyladipate (DBA), di-propylphthalate (DPrP), benzylbenzoate (BB), di-(2-methylpropyl)phthalate (DiBP), di-butylphthalate (DBP), bisphenol A (BPA), benzylbutylphthalate (BBP), di-(2-ethylhexyl)adipate (DEHA), di-n-heptylphthalate (DiHepP), di-cyclo-hexylphthalate (DcHexP), di-(2-ethylhexyl)phthalate (DEHP), di-phenylphthalate (DPhP), di-(2-ethylhexyl)terephthalate (DEHT) and di-(2-ethylhexyl)sebacate (DEHS), were purchased from Aldrich Chemical (Chicago, IL, USA). Internal standards DBP-d4 and DEHP-d4 were bought from Cambridge Isotope Laboratories Inc. (Andover, MA, USA). Individual stock solutions and work solutions were made in ethyl acetate.

n-hexane (99%), Na<sub>2</sub>SO<sub>4</sub> (anhydrous, ACS grade), and the pre-packaged 15 ml centrifuge tube with 900 mg MgSO<sub>4</sub> and 150 mg PSA (an ethylenediamine-N-propyl phase) were bought from Sigma–Aldrich (Steinheim, Germany).

During samples preparation and analysis, laboratory glassware heated at 400 °C for at least 4 h were used (Fankhauser and Grob, 2007) always, while laboratory gloves were never used.

### *Samples*

In this work, 144 samples of aromatic herbs, oregan (*Origanum vulgare*), rosemary (*Rosmarinus officinalis*), thyme (*Thymus vulgaris*), fennel (*Foeniculum vulgare*), laurel (*Laurus nobilis*), mint (*Mentha piperita*), verbena (*Verbena officinalis*) and spices, black pepper (*Piper nigrum*), coriander (*Coriandrum sativum*), carvi (*Carum carvi*) were investigated

(Table 1S). All samples, produced in Mediterranean areas, were dried, not packed and cut into small pieces.

Each sample, purchased in local markets of Algeria (n=26), Tunisia (n=65) and Sicily (Italy) (n=53), was cleaned of debris, ground by a mortar and finally stored until to analysis.

All the samples, suitably homogenized, were subjected to extraction in the solid phase (SPE) according to Cao et al. (2015). After centrifugation, all extracts, filtered through Na<sub>2</sub>SO<sub>4</sub> and concentrated, were available for GC-MS analysis. A procedural blank, prepared by SPE without sample, using the solvents and reagents only, was included with each samples set for quality assurance.

#### ***Instrumentation***

The analyses were performed on a Shimadzu GC-MS 2010 QP-2010 equipped with a quadrupole mass spectrometer (Shimadzu Italia, Milan, Italy).

Analytes were separated on a Supelco SPB-5MS (5 % polydiphenylsiloxane, 95 % polydimethylsiloxane) capillary column (30 m, 0.25 mm i.d., 0.25 µm film thickness).

The experimental condition were: initial oven temperature 60 °C, from 60 to 190 °C at 8 °C/min (5 min hold), from 190 to 240 °C at 8 °C/min (5 min hold), from 240 to 315 °C at 8 °C/min ; carrier gas helium (99.999% purity) at constant rate of 30 cm/sec; transfer line temperature 280 °C; injector temperature 250 °C. Injections were performed with a 60 s splitless injector, then at a split ratio of 1:15; the injection volume was 1 µL.

The acquisition was performed in full scan EI mode (with ionization energy and emission current at 70 eV and 250 µA, respectively) from 40 to 400 amu and in Single Ion Monitoring (SIM) using three characteristic mass fragments for each target analytes.

99 ***GC-MS method validation***

100 For the analytical method validation, linearity, sensitivity, repeatability, extraction  
101 interferences, recovery and precision have been evaluated. The calibration curves were  
102 constructed with standard prepared in ethyl acetate and in aromatic herb extract (Italian  
103 thyme), previously analyzed. Each solution was injected five times each. All peak areas of  
104 target ions were normalized against the peak area of characteristic fragment ( $m/z$  153) of  
105 DBP-d4 and DEHP-d4 (in relation to retention time of each compound), and used in  
106 quantitative analyses. The matrix effect was evaluated according to Di Bella et al. (2014).  
107 From the values obtained, it was observed that the interferences were negligible for any  
108 compound under analysis. Because of this the quantifications were performed by the  
109 calibration curves obtained from the standard in ethyl acetate. The linearity was determined  
110 by the  $R^2$  coefficient: among 19 compounds under analysis,  $R^2$  was between 0.9853 and  
111 0.9988. The limits of detection (LOD) and of quantifications (LOQ) were calculated from the  
112 RSD% of six replicate injection at the lowest detectable concentration (with a signal-to-noise  
113 ratio  $< 3$ ) for each compound, as:  $LOD (mg \cdot Kg^{-1}) = 3 \times RSD\% \times concentration (mg \cdot Kg^{-1})$  and  
114  $LOQ (mg \cdot Kg^{-1}) = 10 \times RSD\% \times concentration (mg \cdot Kg^{-1})$ . LOD and LOQ values were  
115 between 0.005 and 1.303  $mg \cdot Kg^{-1}$ , and 0.017 and 3.013  $mg \cdot Kg^{-1}$ , respectively.  
116 For repeatability, relative standard deviations (RSD %) of peak area measurements,  
117 performed six times, were quantified at the lowest detectable concentration of each analyte.  
118 The RSD% values determined were very good: always better than 5.43 %.  
119 For recovery test of all analytes, appropriate known amounts of compound standards were  
120 added to an Italian thyme sample previously analyzed. The fortified sample was pre-treated  
121 following the protocol already described, after 24 hours. Recovery values, calculated on the  
122 average of three replicate analyses, were between 83 and 110 %.

123

124 Table 1S. Samples information

| Item         | Scientific name                  | Number of sample |       |         | Group         |
|--------------|----------------------------------|------------------|-------|---------|---------------|
|              |                                  | Tunisia          | Italy | Algeria |               |
| Black pepper | <i>Piper nigrum L.</i>           | 6                | 0     | 0       | Spice         |
| Caraway      | <i>Carum carvi L.</i>            | 5                | 4     | 4       | Spice         |
| Coriander    | <i>Coriandrum sativum L.</i>     | 5                | 4     | 5       | Spice         |
| Fennel       | <i>Foeniculum vulgare L.</i>     | 6                | 5     | 5       | Aromatic herb |
| Laurel       | <i>Laurus nobilis L.</i>         | 9                | 9     | 7       | Aromatic herb |
| Mint         | <i>Mentha piperita L.</i>        | 9                | 7     | 0       | Aromatic herb |
| Oregano      | <i>Origanum vulgare L.</i>       | 8                | 9     | 0       | Aromatic herb |
| Rosemary     | <i>Rosmarinus officinalis L.</i> | 6                | 5     | 0       | Aromatic herb |
| Thyme        | <i>Thymus vulgaris L.</i>        | 6                | 6     | 0       | Aromatic herb |
| Verbena      | <i>Verbena officinalis L.</i>    | 5                | 4     | 5       | Aromatic herb |

125

126

## 127 References

128 Cao X, Zhao W and Dabeka R. 2015. Di-(2-ethylhexyl) adipate and 20 phthalates in  
 129 composite food samples from the 2013 Canadian total diet study. Food Addit Contam A  
 130 32:1893–1901.

131 Di Bella G, Potortì AG, Lo Turco V, Saitta M and Dugo G. 2014. Plasticizer residues by  
 132 HRGC-MS in espresso coffees from capsules, pods and moka pots. Food Control 41:185-192.

133 Fankhauser A and Grob K. 2007. Blank problems in trace analysis of diethylhexyl and  
 134 dibutylphthalate: investigation of the sources, tips and tricks. Analytica Chimica Acta.  
 135 582:353–360

136
